# Supplementary material
Source: HighWire-hosted journal article supplement (https://bjsm.bmj.com/content/55/9/468)
Supplement: inline-supplementary-material-7 [file inline-supplementary-material-7.pdf]

**Appendix G. Summary of findings for secondary outcome and quality of evidence assessment (GRADE)<sup>a</sup>**

| <b>Outcome</b>                             | <b>Follow-up time point</b> | <b>Number of participants</b> | <b>MD [95% CI]<sup>b</sup></b> | <b>GRADE</b>                  |
|--------------------------------------------|-----------------------------|-------------------------------|--------------------------------|-------------------------------|
| <b>General Population</b>                  |                             |                               |                                |                               |
| <b>Exercise vs. Control</b>                |                             |                               |                                |                               |
| Quality of Life (SF-36 Physical)           | Short-term                  | 189 <sup>27</sup>             | -1.00 [-3.15 to 1.15]          | Very Low-quality <sup>c</sup> |
| Quality of Life (SF-36 Mental)             | Short-term                  | 189 <sup>27</sup>             | -0.60 [-3.12 to 1.91]          | Very Low-quality <sup>c</sup> |
| Workability (WAI)                          | Short-term                  | 278 <sup>17,27</sup>          | -2.19 [-4.70 to 0.31]          | Low-quality                   |
| <b>Exercise and Education vs. Control</b>  |                             |                               |                                |                               |
| Quality of Life (SF-8 Physical)            | Short-term                  | 34 <sup>30</sup>              | -0.20 [-8.00 to 7.60]          | Very Low-quality <sup>c</sup> |
| Quality of Life (SF-8 Mental)              | Short-term                  | 34 <sup>30</sup>              | -3.20 [-9.35 to 2.95]          | Very Low-quality <sup>c</sup> |
| Quality of Life (COOP-WONCA)               | Short-term                  | 81 <sup>32</sup>              | -2.58 [-6.45 to 1.29]          | Very Low-quality <sup>c</sup> |
| Quality of Life (SF-12 Physical)           | Long-term                   | 280 <sup>8</sup>              | -2.30 [-4.18 to -0.42]         | Low-quality <sup>c</sup>      |
| Quality of Life (SF-12 Mental)             | Long-term                   | 280 <sup>8</sup>              | -1.80 [-4.46 to 0.86]          | Low-quality <sup>c</sup>      |
| Quality of Life (COOP-WONCA)               | Long-term                   | 150 <sup>32,37</sup>          | -3.93 [-8.23 to 0.37]          | Low-quality                   |
| <b>Education vs. Control</b>               |                             |                               |                                |                               |
| Quality of Life (Dartmouth CO-OP)          | Short-term                  | 582 <sup>29</sup>             | -3.36 [-5.44 to -1.29]         | Low-quality <sup>c</sup>      |
| Quality of Life (SF-36 Physical)           | Short-term                  | 137 <sup>41</sup>             | -0.40 [-3.37 to 2.57]          | Very Low-quality <sup>c</sup> |
| Quality of Life (SF-36 Mental)             | Short-term                  | 137 <sup>41</sup>             | -3.10 [-6.29 to 0.08]          | Very Low-quality <sup>c</sup> |
| Quality of Life (SF-36 Physical)           | Long-term                   | 128 <sup>41</sup>             | -1.21 [-4.22 to 1.80]          | Very Low-quality <sup>c</sup> |
| Quality of Life (SF-36 Mental)             | Long-term                   | 128 <sup>41</sup>             | -1.20 [-4.40 to 2.00]          | Very Low-quality <sup>c</sup> |
| <b>Ergonomic and Education vs. Control</b> |                             |                               |                                |                               |
| Quality of Life (SF-12 Physical)           | Short-term                  | 192 <sup>28</sup>             | -0.40 [-2.09 to 1.29]          | Very Low-quality <sup>c</sup> |
| Quality of Life (SF-12 Mental)             | Short-term                  | 192 <sup>28</sup>             | -0.40 [-1.99 to 1.19]          | Very Low-quality <sup>c</sup> |
| Quality of Life (SF-12 Physical)           | Long-term                   | 184 <sup>28</sup>             | -0.50 [-2.14 to 1.14]          | Very Low-quality <sup>c</sup> |
| Quality of Life (SF-12 Mental)             | Long-term                   | 184 <sup>28</sup>             | 0.00 [-1.84 to 1.84]           | Very Low-quality <sup>c</sup> |
| <b>Pregnant Population</b>                 |                             |                               |                                |                               |
| <b>Exercise vs. Control</b>                |                             |                               |                                |                               |
| Quality of Life (SF-8 Physical)            | Short-term                  | 240 <sup>21</sup>             | -2.20 [-4.52 to 0.12]          | Low-quality <sup>c</sup>      |
| Quality of Life (SF-8 Mental)              | Short-term                  | 240 <sup>21</sup>             | -0.50 [-2.45 to 1.45]          | Low-quality <sup>c</sup>      |
| <b>Children Population</b>                 |                             |                               |                                |                               |
| <b>Exercise and Education vs. Control</b>  |                             |                               |                                |                               |
| Quality of Life (MHI-5)                    | Short-term                  | 70 <sup>22</sup>              | -6.67 [-13.83 to 0.49]         | Very Low-quality <sup>c</sup> |

Abbreviations: GRADE, Grading of Recommendations Assessment, Development and Evaluation; MD, Mean Difference; CI, Confidence Interval.

<sup>a</sup> Only studies providing results that could be converted to a 0-100 points scale are presented.

<sup>b</sup> Value presented on 0-100 scale.

<sup>c</sup> Quality of evidence assessment based on a single trial.

A negative value of the mean difference estimate represents an effect in favour of the intervention group.

Short-term indicates follow-up assessment of less than 12-months.

Long-term indicates follow-up assessment of 12-months or more.
